# Supplementary material for: Physicochemical stimuli as tuning parameters to modulate the structure and stability of nanostructured lipid carriers and release kinetics of encapsulated antileprosy drugs
Source: Royal Society of Chemistry journal article supplement (doi:10.1039/c9tb01330j), 2019-01-01
Supplement: c9tb01330j1.pdf [file c9tb01330j1.pdf]

## Supplementary Information

### Physicochemical stimuli as a tuning parameter to modulate the structure, stability and release kinetics of dapsone encapsulated nanostructured lipid carriers

Rohini Kanwar,<sup>1</sup> Michael Gradzielski,<sup>2</sup> Sylvain Prevost,<sup>3\*</sup> Gurpreet Kaur,<sup>1</sup>  
Marie-Sousai Appavou<sup>4</sup> and S.K. Mehta<sup>1\*</sup>

#### SANS EQUATIONS

Based on earlier models,<sup>1</sup> the population of large scatterers was modeled as polydisperse homogeneous spheres with a log-normally distributed radius and the population of small scatterers as core-shell monodisperse triaxial ellipsoids.

The intensity for polydisperse homogeneous spheres ( $I_{\text{sphere}}$ ) and  $K(Q, R, \Delta SLD)$  with radius R and  $\Delta SLD$  is given by

$$I_{\text{sphere}}(Q, R) = {}^1N_{\text{sph}} \cdot \langle (V_{\text{sph}} \cdot \Delta SLD)^2 \rangle \cdot P(Q) \cdot S(Q) \quad (\text{S1})$$

where  ${}^1N$ ,  $\langle V_{\text{sph}} \cdot \Delta SLD \rangle$ ,  $P(Q)$  and  $S(Q)$  are the number density of scattering particles, mean average of volume and scattering contrast multiplication factor, form factor and structure factor.

For triaxial ellipsoidal core shell micelles,  $I_{ii}(Q, R, \nu)$  with a radius of rotation axis 'R' is given by:

$$I_{\text{triaxEllSh}}(Q) = \int_0^1 \int_0^1 dx dy K_{sh}^2(Q, R, R_t) \quad (\text{S2})$$

$$K(QR) = 3 \frac{\sin QR - QR \cos QR}{QR^3} \quad (\text{S3})$$

$$K_{sh}(Q, R, R_t) = (\eta_c - \eta_{sh}) K(QR) + (\eta_{sh} - \eta_{sol}) K(QR_t) \quad (\text{S4})$$

$$R^2 = \left[ a^2 \cos^2\left(\frac{\pi x}{2}\right) + b^2 \sin^2\left(\frac{\pi x}{2}\right) \right] (1 - y^2) + c^2 y^2 \quad (\text{S5})$$

$$R_t^2 = \left[ (a+t)^2 \cos^2\left(\frac{\pi x}{2}\right) + (b+t)^2 \sin^2\left(\frac{\pi x}{2}\right) \right] (1-y^2) + (c+t)^2 y^2 \quad (\text{S6})$$

$$V_c = \frac{4}{3} \pi abc \quad (\text{S7})$$

$$V_t = \frac{4}{3} \pi (a+t)(b+t)(c+t) \quad (\text{S8})$$

where  $\eta_c, \eta_{sh}, \eta_{sol}$  are scattering length density of core, shell, and solvent, respectively. a, b, c, are the semi-axes of the elliptical core, t is the thickness of the shell.  $V_c$  and  $V_t$  are the volumes of core and total volume of the core along with the shell.

## KINETIC EQUATIONS

**Zero-order kinetics:**  $F = k_0 \cdot t \quad (\text{S9})$

**Higuchi kinetics:**  $F = k_H \cdot t^{1/2} \quad (\text{S10})$

**First-order / First-order exponential kinetics:**  $F = F_0 - b e^{-kt} \quad (\text{S11})$

**Hixon-Crowell model:**  $1 - (1 - F)^{3/2} = k_1 t \quad (\text{S12})$

**Square root of mass:**  $1 - (1 - F)^{1/2} = k_1 t \quad (\text{S13})$

**Three seconds root of mass:**  $1 - [(1 - F)^2]^{3/2} = k_2 t \quad (\text{S14})$

**Weibull kinetics:**  $\ln [-\ln(1 - F)] = -\beta \ln t_d + \beta \ln t \quad (\text{S15})$

**Korsmeyer-Peppas (KP)/ Power law model:**  $F = k_p t^n \quad (\text{S16})$

where F denotes the fraction of drug released up to time t,  $k_0, k_H, F_0, b, k, k_{1/3}, k_{1/2}, k_{2/3}, \beta, t_d, k_p$  are the constants of the models and n is the release exponential which characterizes the release mechanism.

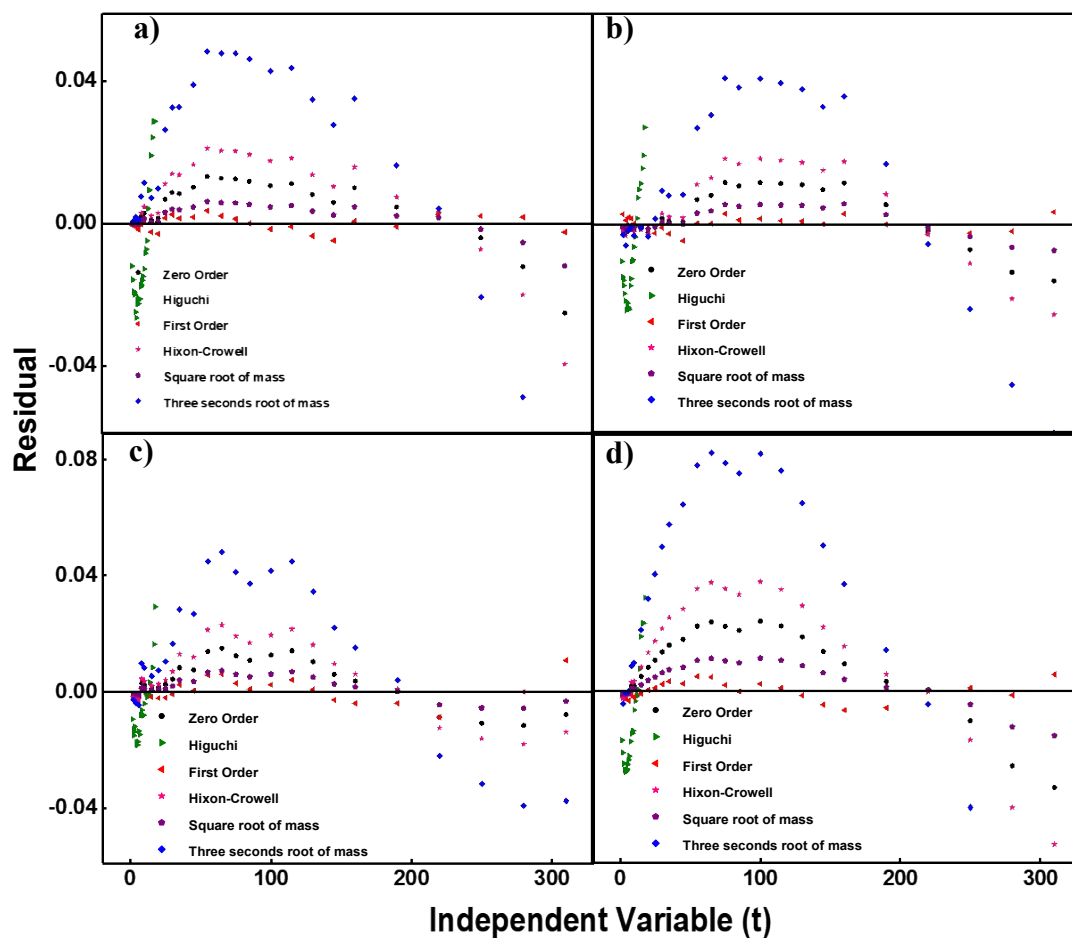

**Fig. S1.** a)  $D_{12}DAB$ , b)  $D_{14}DAB$ , c)  $D_{16}DAB$  and d)  $D_{18}DAB$  based NLCs *in-vitro* release profiles for Rifampicin loaded NLCs evaluated w.r.t. residuals obtained from the experimental data

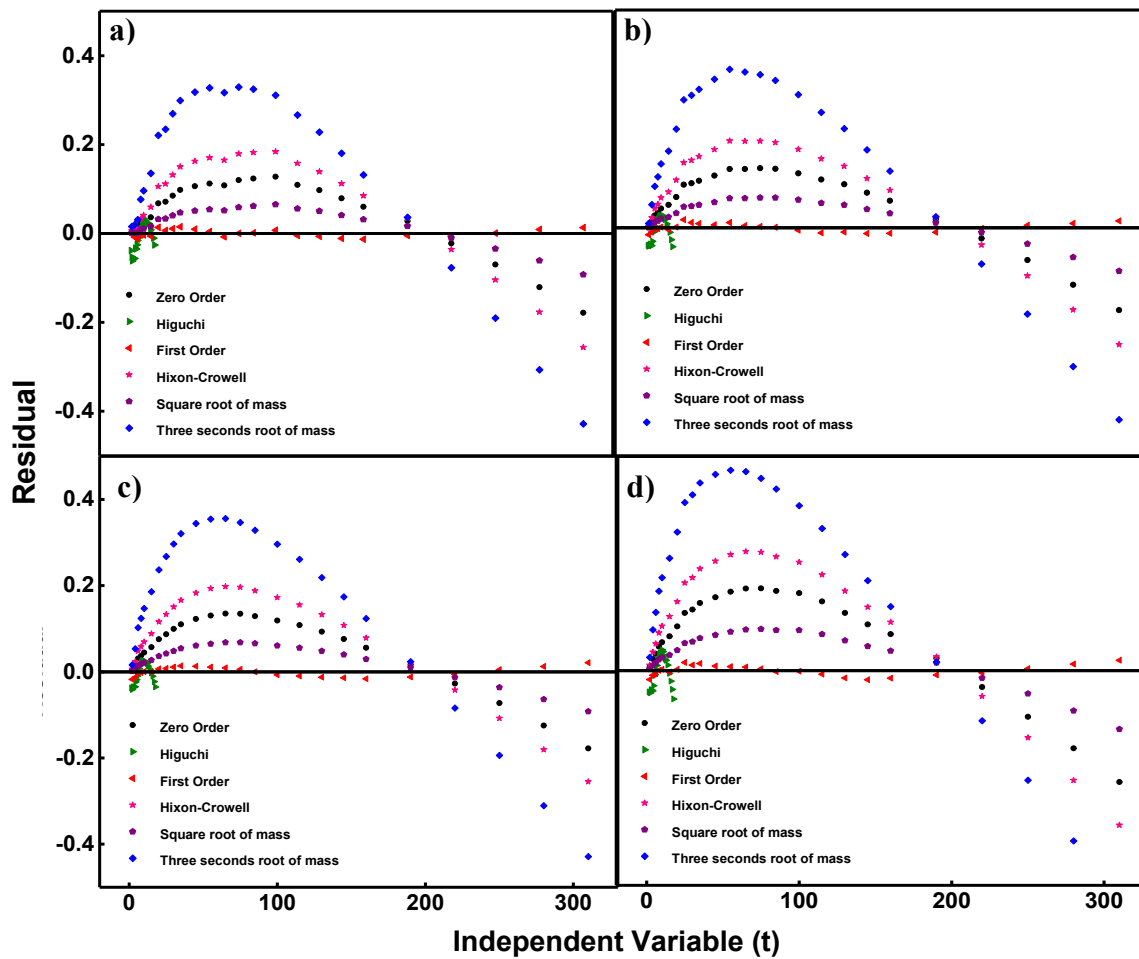

**Fig. S2.** a)  $D_{12}$ DAB, b)  $D_{14}$ DAB, c)  $D_{16}$ DAB and d)  $D_{18}$ DAB based NLCs *in-vitro* release profiles for Dapsone loaded NLCs valuated w.r.t. residuals obtained from the experimental data.

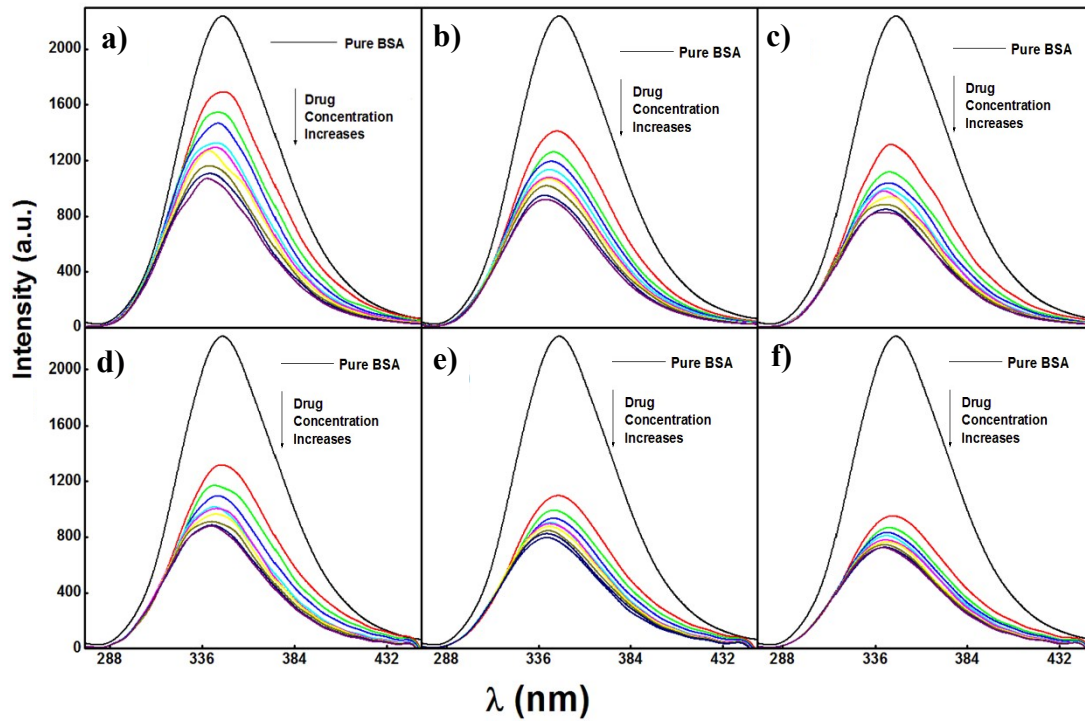

**Fig. S3.** Fluorescence spectra of BSA upon addition of Rifampicin encapsulated- D<sub>16</sub>DAB NLCs at a) 298.15 K b) 303.15 K c) 308.15 K and D<sub>18</sub>DAB NLCs at d) 298.15 K e) 303.15 K f) 308.15 K.

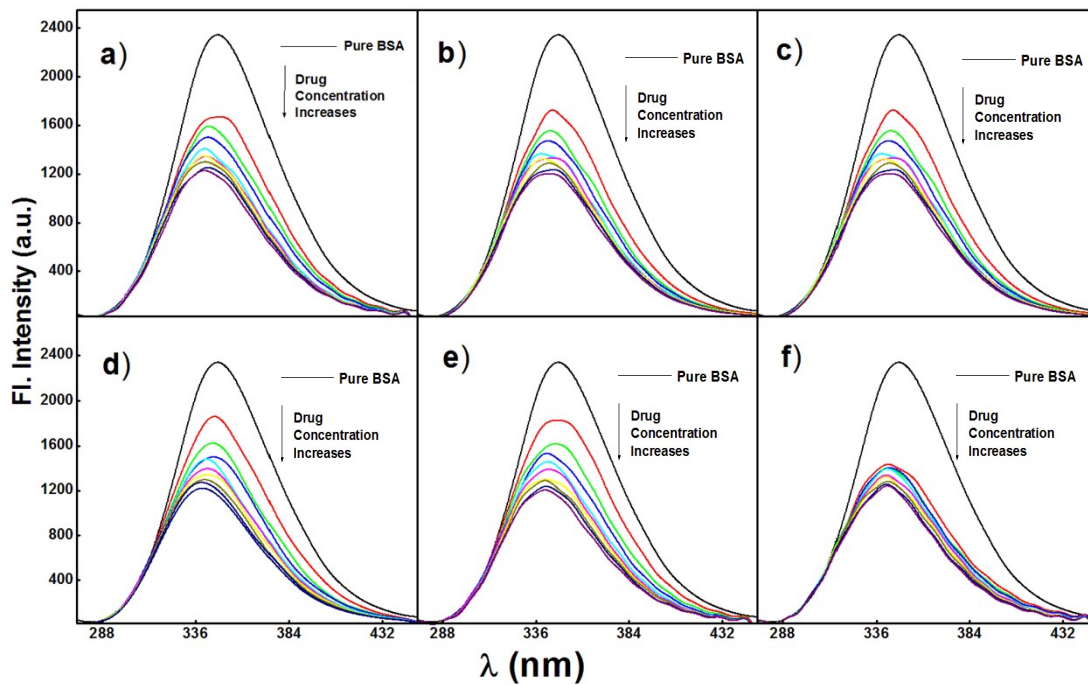

**Fig. S4.** Fluorescence spectra of BSA upon addition of Dapsone encapsulated- D<sub>12</sub>DAB NLCs at a) 298.15 K b) 303.15 K c) 308.15 K and D<sub>14</sub>DAB NLCs at d) 298.15 K e) 303.15 K f) 308.15 K.

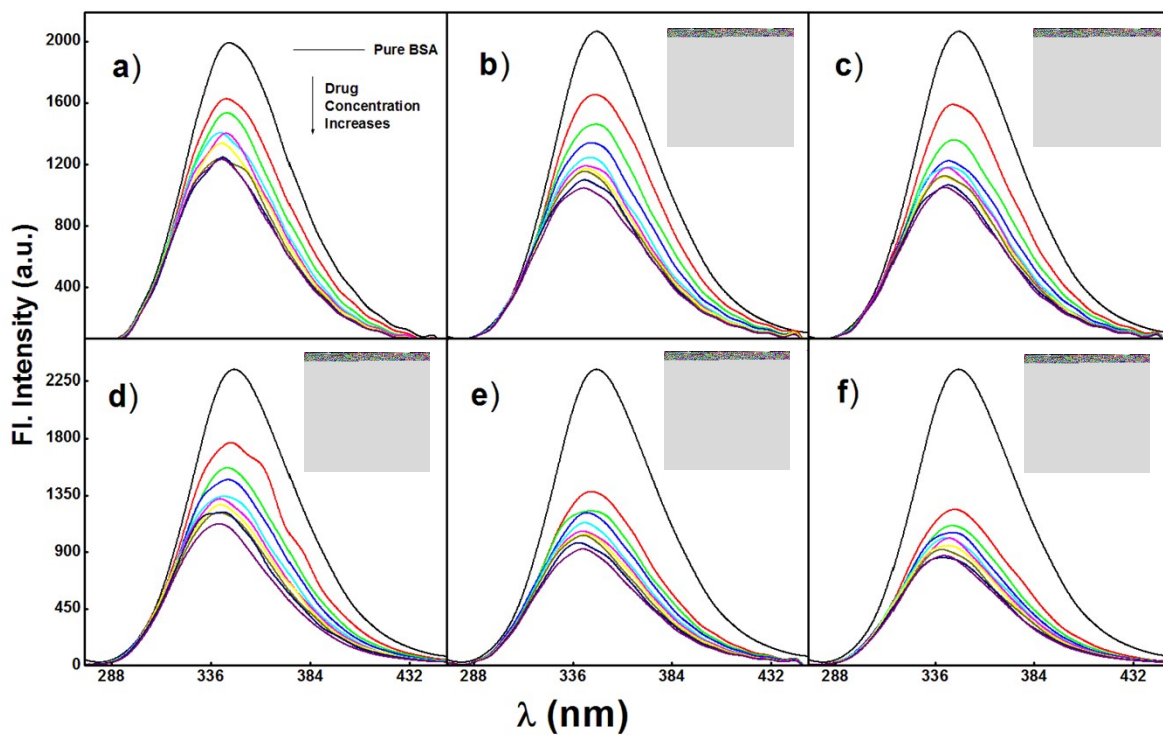

**Fig. S5.** Fluorescence spectra of BSA upon addition of Rifampicin encapsulated- D<sub>16</sub>DAB NLCs at a) 298.15 K b) 303.15 K c) 308.15 K and D<sub>18</sub>DAB NLCs at d) 298.15 K e) 303.15 K f) 308.15 K.

**Table S1** Model-free analysis generated Guinier radii, forward scattering  $I(0)$ , scattering contrast  $\Delta$ SLD, dispersed volume fraction  $\phi$ , the molecular weight of solid spheres  $M_w$ , scattering Invariant, porod constant, specific surface area (S/V), Porod volume and radius

| Q-range      | NLCs                                                | Characteristic Parameters                                 | 0 mM                                                      | 1 mM  | 5 mM  | 20 mM | 50 mM  | 200 mM |
|--------------|-----------------------------------------------------|-----------------------------------------------------------|-----------------------------------------------------------|-------|-------|-------|--------|--------|
| Low Q-range  | <b>D<sub>12</sub>DAB</b>                            | Guinier radius (nm)                                       | 74                                                        | 77    | 77    | 73    | 71     | 55     |
|              |                                                     | $I(0)$ (cm <sup>-1</sup> )                                | 750                                                       | 1087  | 1313  | 1805  | 2154   | 1341   |
|              |                                                     | $M_w * 10^7$ (g/mol)                                      | 0.29                                                      | 0.42  | 0.51  | 0.70  | 0.83   | 0.52   |
|              | <b>D<sub>14</sub>DAB</b>                            | Guinier radius (nm)                                       | 80                                                        | 85    | 86    | 81    | 80     | 65     |
|              |                                                     | $I(0)$ (cm <sup>-1</sup> )                                | 1115                                                      | 1753  | 2163  | 2919  | 3446   | 2437   |
|              |                                                     | $M_w * 10^7$ (g/mol)                                      | 0.43                                                      | 0.67  | 0.83  | 1.12  | 1.32   | 0.94   |
|              | <b>D<sub>16</sub>DAB</b>                            | Guinier radius (nm)                                       | 83                                                        | 87    | 91    | 84    | 81     | 67     |
|              |                                                     | $I(0)$ (cm <sup>-1</sup> )                                | 1294                                                      | 2075  | 2632  | 3458  | 3754   | 2540   |
|              |                                                     | $M_w * 10^7$ (g/mol)                                      | 0.50                                                      | 0.80  | 1.01  | 1.33  | 1.45   | 0.98   |
|              | <b>D<sub>18</sub>DAB</b>                            | Guinier radius (nm)                                       | 70                                                        | 73    | 77    | 72    | 71     | 66     |
|              |                                                     | $I(0)$ (cm <sup>-1</sup> )                                | 710                                                       | 1109  | 1508  | 1950  | 1999   | 1875   |
|              |                                                     | $M_w * 10^7$ (g/mol)                                      | 0.27                                                      | 0.43  | 0.58  | 0.75  | 0.77   | 0.72   |
| High Q-range | <b>D<sub>12</sub>DAB</b>                            | Scattering Invariant (cm <sup>-1</sup> nm <sup>-3</sup> ) | 0.570                                                     | 0.615 | 0.642 | 0.670 | 0.637  | 0.609  |
|              |                                                     | Porod constant (cm <sup>-1</sup> nm <sup>-4</sup> )       | 0.15                                                      | 0.19  | 0.21  | 0.27  | 0.18   | 0.12   |
|              |                                                     | Specific surface area (S/V) (nm <sup>-1</sup> )           | 0.86                                                      | 0.95  | 1.02  | 1.28  | 0.91   | 0.60   |
|              |                                                     | Porod radii (R <sub>p</sub> ) (nm)                        | 18.4                                                      | 20.3  | 201.3 | 23.3  | 25.1   | 21.8   |
|              |                                                     | Porod volume (V <sub>p</sub> ) (nm <sup>3</sup> )         | 25981                                                     | 34858 | 40331 | 53207 | 66699  | 43475  |
|              |                                                     | <b>D<sub>14</sub>DAB</b>                                  | Scattering Invariant (cm <sup>-1</sup> nm <sup>-3</sup> ) | 0.574 | 0.603 | 0.657 | 0.613  | 0.643  |
|              | Porod constant (cm <sup>-1</sup> nm <sup>-4</sup> ) |                                                           | 0.136                                                     | 0.151 | 0.228 | 0.125 | 0.193  | 0.170  |
|              | Specific surface area (S/V) (nm <sup>-1</sup> )     |                                                           | 0.75                                                      | 0.78  | 1.09  | 0.64  | 0.94   | 0.82   |
|              | Porod radii (R <sub>p</sub> ) (nm)                  |                                                           | 20.9                                                      | 23.9  | 24.9  | 28.2  | 29.3   | 26.1   |
|              | Porod volume (V <sub>p</sub> ) (nm <sup>3</sup> )   |                                                           | 38337                                                     | 57344 | 64946 | 94003 | 105780 | 74245  |
|              | <b>D<sub>16</sub>DAB</b>                            |                                                           | Scattering Invariant (cm <sup>-1</sup> nm <sup>-3</sup> ) | 0.565 | 0.648 | 0.670 | 0.661  | 0.679  |

|                          |                                                          |       |       |       |        |        |       |
|--------------------------|----------------------------------------------------------|-------|-------|-------|--------|--------|-------|
|                          | Porod constant ( $\text{cm}^{-1} \text{nm}^{-4}$ )       | 0.094 | 0.184 | 0.253 | 0.184  | 0.213  | 0.163 |
|                          | Specific surface area (S/V) ( $\text{nm}^{-1}$ )         | 0.52  | 0.89  | 1.19  | 0.88   | 0.98   | 0.78  |
|                          | Porod radii ( $R_p$ ) (nm)                               | 22.1  | 24.7  | 26.4  | 29.1   | 29.6   | 26.3  |
|                          | Porod volume ( $V_p$ ) ( $\text{nm}^3$ )                 | 45215 | 63204 | 77512 | 103280 | 108990 | 76245 |
| <b>D<sub>18</sub>DAB</b> | Scattering Invariant ( $\text{cm}^{-1} \text{nm}^{-3}$ ) | 0.645 | 0.628 | 0.662 | 0.638  | 0.619  | 0.644 |
|                          | Porod constant ( $\text{cm}^{-1} \text{nm}^{-4}$ )       | 0.29  | 0.14  | 0.205 | 0.169  | 0.137  | 0.17  |
|                          | Specific surface area (S/V) ( $\text{nm}^{-1}$ )         | 1.41  | 0.718 | 0.974 | 0.83   | 0.69   | 0.84  |
|                          | Porod radii ( $R_p$ ) (nm)                               | 18.9  | 23.8  | 24.9  | 27.5   | 28.4   | 25.9  |
|                          | Porod volume ( $V_p$ ) ( $\text{nm}^3$ )                 | 28157 | 56225 | 64694 | 87082  | 96423  | 73217 |

**Table S2** Key parameters obtained after analysis of neutron scattering data experimentally for D<sub>12</sub>DAB NLCs upon electrolyte variation



| <b>Component</b>             |                                                                 | <b>0 mM</b>                                           | <b>1 mM</b> | <b>5 mM</b> | <b>20 mM</b> | <b>50 mM</b> | <b>200 mM</b> |
|------------------------------|-----------------------------------------------------------------|-------------------------------------------------------|-------------|-------------|--------------|--------------|---------------|
| <b>Large spheres</b>         | $^1\text{N}$<br>(*10 <sup>-7</sup> nm <sup>-3</sup> )           | 0.0062                                                | 0.0062      | 0.0108      | 0.0073       | 0.011        | 0.0218        |
|                              | mu                                                              | 14.43                                                 | 15.67       | 13.38       | 19.55        | 18.71        | 19.93         |
|                              | s                                                               | 0.55                                                  | 0.55        | 0.59        | 0.50         | 0.50         | 0.39          |
|                              | $\langle V^2 \rangle / \langle V \rangle$<br>(nm <sup>3</sup> ) | 747201                                                | 956854      | 1102449     | 914687       | 801777       | 258445        |
|                              | R (nm)                                                          | 56                                                    | 61          | 64          | 60           | 58           | 39            |
|                              | $\phi_{\text{assumed}}$ for<br>spheres (%)                      | 0.05                                                  | 0.06        | 0.12        | 0.07         | 0.09         | 0.06          |
|                              | <b>Small triaxial core-shell ellipsoidal micelles</b>           | $^1\text{N}$<br>(*10 <sup>-7</sup> nm <sup>-3</sup> ) | 136.97      | 147.04      | 149.76       | 147.70       | 146.32        |
| SLD <sub>core</sub>          |                                                                 | -8.30E-06                                             | -8.30E-06   | -8.30E-06   | -8.30E-06    | -8.30E-06    | -8.30E-06     |
| SLD <sub>shell</sub>         |                                                                 | 8.26E-05                                              | 8.26E-05    | 8.26E-05    | 8.26E-05     | 8.26E-05     | 8.26E-05      |
| SLD <sub>m</sub>             |                                                                 | 0.000584                                              | 0.000584    | 0.000584    | 0.000584     | 0.000584     | 0.000584      |
| a                            |                                                                 | 0.95                                                  | 0.95        | 0.95        | 0.95         | 0.95         | 0.95          |
| b                            |                                                                 | 2.40                                                  | 2.40        | 2.40        | 2.40         | 2.40         | 2.40          |
| c                            |                                                                 | 9.96                                                  | 9.96        | 9.96        | 9.96         | 9.96         | 9.96          |
| t                            |                                                                 | 2.27                                                  | 2.27        | 2.27        | 2.27         | 2.27         | 2.27          |
| V                            |                                                                 | 770.35                                                | 770.35      | 770.35      | 770.35       | 770.35       | 770.35        |
| $\phi_{\text{micelles}}$ (%) |                                                                 | 1.06                                                  | 1.13        | 1.15        | 1.14         | 1.13         | 1.09          |

**Table S3** Model-free analysis generated Guinier radii, forward scattering  $I(0)$ , scattering contrast  $\Delta\text{SLD}$ , dispersed volume fraction  $\phi$ , the molecular weight of solid spheres  $M_w$ , scattering Invariant, porod constant, specific surface area (S/V), Porod volume and radius.

|                               |                                                           | <i>pD variation</i>      |       |       |       |       |       |
|-------------------------------|-----------------------------------------------------------|--------------------------|-------|-------|-------|-------|-------|
| <b>D<sub>12</sub>DAB NLCs</b> | Characteristic Parameters                                 | 2 pD                     | 3 pD  | 5 pD  | 7 pD  | 9 pD  | 11 pD |
| <b>Low Q-range</b>            | Guinier radius (nm)                                       | 78                       | 78    | 79    | 80    | 72    | 53    |
|                               | I(0) (cm <sup>-1</sup> )                                  | 2220                     | 1594  | 1323  | 1523  | 389   | 259   |
|                               | M <sub>w</sub> * 10 <sup>7</sup> (g/mol)                  | 0.86                     | 0.61  | 0.51  | 0.58  | 0.15  | 0.10  |
| <b>High Q-range</b>           | Scattering Invariant (cm <sup>-1</sup> nm <sup>-3</sup> ) | 1.08                     | 1.14  | 1.05  | 1.04  | 1.06  | 1.09  |
|                               | Porod constant (cm <sup>-1</sup> nm <sup>-4</sup> )       | 0.24                     | 0.31  | 0.27  | 0.24  | 0.37  | 0.54  |
|                               | Specific surface area (S/V) (nm <sup>-1</sup> )           | 0.70                     | 0.86  | 0.81  | 0.74  | 1.11  | 1.55  |
|                               | Porod radii (R <sub>p</sub> ) (nm)                        | 21.3                     | 18.7  | 18.1  | 19.0  | 12.0  | 10.4  |
|                               | Porod volume (V <sub>p</sub> ) (nm <sup>3</sup> )         | 40609                    | 27593 | 24739 | 28807 | 7254  | 4665  |
|                               |                                                           | <i>Pluronic addition</i> |       |       |       |       |       |
| <b>D<sub>12</sub>DAB NLCs</b> | Characteristic Parameters                                 | 0 %                      | 0.1 % | 0.3 % | 0.5 % | 0.7 % | 1 %   |
| <b>Low Q-range</b>            | Guinier radius (nm)                                       | 78                       | 76    | 74    | 87    | 91    | 100   |
|                               | I(0) (cm <sup>-1</sup> )                                  | 1594                     | 1510  | 1526  | 3388  | 3815  | 4861  |
|                               | M <sub>w</sub> * 10 <sup>7</sup> (g/mol)                  | 0.61                     | 0.58  | 0.59  | 1.31  | 1.47  | 1.87  |
| <b>High Q-range</b>           | Scattering Invariant (cm <sup>-1</sup> nm <sup>-3</sup> ) | 1.14                     | 1.06  | 1.12  | 1.11  | 1.01  | 1.06  |
|                               | Porod constant (cm <sup>-1</sup> nm <sup>-4</sup> )       | 0.31                     | 0.27  | 0.36  | 0.34  | 0.25  | 0.40  |
|                               | Specific surface area (S/V) (nm <sup>-1</sup> )           | 0.86                     | 0.82  | 1.02  | 0.97  | 0.78  | 1.18  |
|                               | Porod radii (R <sub>p</sub> ) (nm)                        | 18.7                     | 18.9  | 18.6  | 24.3  | 26.1  | 27.8  |
|                               | Porod volume (V <sub>p</sub> ) (nm <sup>3</sup> )         | 27593                    | 28219 | 26864 | 60250 | 74717 | 90516 |

**Table S4** Key parameters obtained after analysis of neutron scattering data experimentally for D<sub>12</sub>DAB NLCs upon pD variation

|                  |  | <i>pD variation</i> |      |      |      |      |       |
|------------------|--|---------------------|------|------|------|------|-------|
| <b>Component</b> |  | 2 pD                | 3 pD | 5 pD | 7 pD | 9 pD | 11 pD |

|                                              |                                         |           |           |           |           |           |           |
|----------------------------------------------|-----------------------------------------|-----------|-----------|-----------|-----------|-----------|-----------|
| <b>Large spheres</b>                         | $^1\text{N} (*10^{-7}\text{nm}^{-3})$   | 0.407     | 1.54      | 0.677     | 0.328     | 0.459     | 1.59      |
|                                              | $\mu$                                   | 17.06     | 11.71     | 13.52     | 16.52     | 11.57     | 8.63      |
|                                              | $p$                                     | 2.55      | 2.65      | 2.65      | 2.65      | 2.65      | 2.65      |
|                                              | $s$                                     | 0.72      | 0.66      | 0.66      | 0.66      | 0.66      | 0.66      |
|                                              | Average volume ( $\text{nm}^3$ )        | 19034     | 5494      | 8469      | 15446     | 5303      | 2199      |
|                                              | Average R (nm)                          | 281.9     | 120.1     | 138.7     | 169.5     | 118.7     | 88.5      |
|                                              | $\phi_{\text{assumed}}$ for spheres (%) | 0.077     | 0.085     | 0.057     | 0.051     | 0.024     | 0.035     |
| <b>Mid sized spheres</b>                     | $^1\text{N} (*10^{-7}\text{nm}^{-3})$   | 14.6      | -         | -         | -         | -         | 0.091     |
|                                              | $\mu$                                   | 8.44      | -         | -         | -         | -         | 16.32     |
|                                              | $p$                                     | 1         | -         | -         | -         | -         | 1         |
|                                              | $s$                                     | 0.26      | -         | -         | -         | -         | 0.021     |
|                                              | Average volume ( $\text{nm}^3$ )        | 3409      | -         | -         | -         | -         | 18274     |
|                                              | Average R (nm)                          | 13.5      | -         | -         | -         | -         | 16.4      |
|                                              | $\phi_{\text{assumed}}$ for spheres (%) | 0.50      | -         | -         | -         | -         | 0.02      |
| <b>Small triaxial core-shell ellipsoidal</b> | $^1\text{N} (*10^{-7}\text{nm}^{-3})$   | 3.58E-05  | 3.10E-05  | 2.23E-05  | 2.88E-05  | 5.59E-05  | 6.44E-05  |
|                                              | $\text{SLD}_{\text{core}}$              | -8.30E-06 | -8.30E-06 | -8.30E-06 | -8.30E-06 | -8.30E-06 | -8.30E-06 |
|                                              | $\text{SLD}_{\text{shell}}$             | 8.00E-05  | 4.90E-05  | 4.90E-05  | 4.90E-05  | 4.90E-05  | 4.90E-05  |
|                                              | $\text{SLD}_m$                          | 0.000584  | 0.000584  | 0.000584  | 0.000584  | 0.000584  | 0.000584  |
|                                              | $a$                                     | 0.50      | 1.03      | 1.04      | 1.68      | 0.23      | 0.15      |
|                                              | $b$                                     | 2.93      | 2.57      | 2.98      | 2.49      | 3.83      | 4.47      |

|                 |                                         |       |       |        |        |       |       |
|-----------------|-----------------------------------------|-------|-------|--------|--------|-------|-------|
| <b>micelles</b> | c                                       | 4.55  | 8.86  | 12.12  | 7.31   | 4.65  | 4.49  |
|                 | t                                       | 2.1   | 2.1   | 2.1    | 2.1    | 2.1   | 2.1   |
|                 | Average<br>volume<br>(nm <sup>3</sup> ) | 28.16 | 98.15 | 157.44 | 128.43 | 17.32 | 12.55 |
|                 | $\phi_{\text{micelles}}$<br>(%)         | 0.10  | 0.30  | 0.35   | 0.37   | 0.10  | 0.08  |
|                 |                                         |       |       |        |        |       |       |

**Table S5** Key parameters obtained after analysis of neutron scattering data experimentally for D<sub>12</sub>DAB NLCs upon addition of polymer

---

*Pluronic addition*

---

| <b>Component</b>                  | 0 %                                                   | 1 %                                         | 3 %       | 5 %       | 7 %       | 10 %      |           |
|-----------------------------------|-------------------------------------------------------|---------------------------------------------|-----------|-----------|-----------|-----------|-----------|
| <b>Large spheres</b>              | $^1N$ (*10 <sup>-7</sup> nm <sup>-3</sup> )           | 0.442                                       | 0.600     | 0.823     | 0.196     | 0.151     | 0.084     |
|                                   | mu                                                    | 17.65                                       | 16.59     | 15.67     | 24.71     | 26.44     | 31.24     |
|                                   | s                                                     | 0.66                                        | 0.66      | 0.66      | 0.66      | 0.66      | 0.66      |
|                                   | p                                                     | 2.65                                        | 2.65      | 2.65      | 2.65      | 2.65      | 2.65      |
|                                   | Average volume (nm <sup>3</sup> )                     | 18830                                       | 15629     | 13179     | 51696     | 63326     | 104432    |
|                                   | Average R (nm)                                        | 181.1                                       | 170.2     | 160.8     | 253.5     | 271.3     | 320.5     |
|                                   | $\phi_{\text{assumed}}$ for spheres (%)               | 0.083                                       | 0.094     | 0.11      | 0.10      | 0.096     | 0.087     |
|                                   | <b>Small triaxial core-shell ellipsoidal micelles</b> | $^1N$ (*10 <sup>-7</sup> nm <sup>-3</sup> ) | 285.413   | 214.107   | 189.014   | 113.458   | 85.9577   |
| SLD <sub>core</sub>               |                                                       | -8.30E-06                                   | -8.30E-06 | -8.30E-06 | -8.30E-06 | -8.30E-06 | -8.30E-06 |
| SLD <sub>shell</sub>              |                                                       | 4.90E-05                                    | 4.90E-05  | 4.90E-05  | 4.90E-05  | 4.90E-05  | 4.90E-05  |
| SLD <sub>m</sub>                  |                                                       | 0.000584                                    | 0.000584  | 0.000584  | 0.000584  | 0.000584  | 0.000584  |
| a                                 |                                                       | 0.86                                        | 0.86      | 0.86      | 0.86      | 0.86      | 0.86      |
| b                                 |                                                       | 3.02                                        | 3.17      | 3.39      | 4.20      | 4.60      | 4.99      |
| c                                 |                                                       | 8.44                                        | 10.54     | 11.43     | 17.07     | 19.95     | 18.83     |
| t                                 |                                                       | 2.1                                         | 2.1       | 2.1       | 2.1       | 2.1       | 2.1       |
| Average volume (nm <sup>3</sup> ) |                                                       | 92.41                                       | 121.27    | 140.36    | 259.93    | 332.59    | 340.13    |
| $\phi_{\text{micelles}}$ (%)      |                                                       | 0.26                                        | 0.26      | 0.27      | 0.29      | 0.29      | 0.29      |

**Table S6** Entrapment efficiency (EE) and Loading capacity (LC) for all the NLCs at 25 °C for Rifampicin and Dapsone

| NLCs                     | Rifampicin |           | Dapsone    |             |
|--------------------------|------------|-----------|------------|-------------|
|                          | EE (%)     | LC (%)    | EE (%)     | LC (%)      |
| <b>D<sub>12</sub>DAB</b> | 98.2± 0.18 | 1.44±0.05 | 97.1± 0.20 | 0.065±0.003 |
| <b>D<sub>14</sub>DAB</b> | 98.3± 0.18 | 1.15±0.05 | 98.7± 0.21 | 0.055±0.003 |
| <b>D<sub>16</sub>DAB</b> | 98.6± 0.20 | 1.29±0.05 | 98.8± 0.20 | 0.054±0.003 |
| <b>D<sub>18</sub>DAB</b> | 98.2± 0.16 | 1.66±0.05 | 96.6± 0.17 | 0.059±0.003 |

**Table S7** Rate constants and regression correlations {regression coefficient (R) and residual sum of squares (R<sup>2</sup>)} using kinetic equations for the release of Rifampicin from D<sub>x</sub>DAB NLCs

| Kinetic Model                    |                  | D <sub>12</sub> DAB | D <sub>14</sub> DAB | D <sub>16</sub> DAB | D <sub>18</sub> DAB |
|----------------------------------|------------------|---------------------|---------------------|---------------------|---------------------|
| Zero-order kinetics              | k <sub>0</sub>   | 0.00071             | 0.00056             | 0.00051             | 0.00089             |
|                                  | R                | 0.99496             | 0.99444             | 0.99183             | 0.9906              |
|                                  | R <sup>2</sup>   | 0.00221             | 0.00152             | 0.00177             | 0.0065              |
| Higuchi kinetics                 | k <sub>H</sub>   | 0.00942             | 0.00739             | 0.00664             | 0.01191             |
|                                  | R                | 0.9797              | 0.97447             | 0.98182             | 0.98536             |
|                                  | R <sup>2</sup>   | 0.00884             | 0.00689             | 0.00392             | 0.0101              |
| First-order exponential kinetics | k                | 0.00282             | 0.00349             | 0.00339             | 0.0041              |
|                                  | R                | <b>0.99939</b>      | <b>0.99908</b>      | <b>0.99543</b>      | <b>0.99909</b>      |
|                                  | R <sup>2</sup>   | <b>0.00011</b>      | <b>0.00011</b>      | <b>0.00040</b>      | <b>0.00025</b>      |
| Hixon-Crowell model              | k <sub>1/3</sub> | 0.00102             | 0.00081             | 0.000725            | 0.00127             |
|                                  | R                | 0.99372             | 0.99353             | 0.99085             | 0.9885              |
|                                  | R <sup>2</sup>   | 0.00574             | 0.00374             | 0.00423             | 0.01627             |
| Square root of mass              | k <sub>1/2</sub> | 0.00037             | 0.00029             | 0.00025             | 0.00046             |
|                                  | R                | 0.99608             | 0.99527             | 0.99274             | 0.99253             |
|                                  | R <sup>2</sup>   | 0.00046             | 0.00034             | 0.00041             | 0.00142             |
| Three seconds root of mass       | k <sub>2/3</sub> | 0.00182             | 0.00148             | 0.00134             | 0.0022              |
|                                  | R                | 0.98928             | 0.99047             | 0.98755             | 0.9813              |
|                                  | R <sup>2</sup>   | 0.03134             | 0.01847             | 0.01975             | 0.08068             |
| Weibull kinetics                 | β                | 0.99413             | 1.10391             | 1.10963             | 1.01068             |
|                                  | R                | 0.99634             | 0.99441             | 0.96217             | 0.98907             |
|                                  | R <sup>2</sup>   | 0.35099             | 0.42091             | 3.72897             | 0.85718             |
| Korsmeyer-Peppas (KP) model      | k <sub>k</sub>   | 0.00089             | 0.0004              | 0.00037             | 0.00113             |

|   |         |         |         |         |
|---|---------|---------|---------|---------|
| n | 0.97305 | 1.0831  | 1.0933  | 0.98057 |
| R | 0.99542 | 0.99352 | 0.96015 | 0.98676 |

**Table S8** Rate constants and regression correlations {regression coefficient (R) and residual sum

| Kinetic Model                       |                  | D <sub>12</sub> DAB | D <sub>14</sub> DAB | D <sub>16</sub> DAB | D <sub>18</sub> DAB |
|-------------------------------------|------------------|---------------------|---------------------|---------------------|---------------------|
| Zero-order kinetics                 | k <sub>o</sub>   | 0.00237             | 0.00236             | 0.00231             | 0.00318             |
|                                     | R                | 0.96252             | 0.95398             | 0.95474             | 0.95051             |
|                                     | R <sup>2</sup>   | 0.19409             | 0.23906             | 0.22479             | 0.46883             |
| Korsmeyer-Peppas<br>(KP) model      | k <sub>k</sub>   | -5.06672            | -4.6325             | -4.52007            | -4.08233            |
|                                     | n                | 0.85198             | 0.76702             | 0.73789             | 0.71403             |
|                                     | R                | 0.97719             | 0.96858             | 0.97421             | 0.97687             |
| Higuchi kinetics                    | k <sub>H</sub>   | 0.03313             | 0.0333              | 0.03258             | 0.04501             |
|                                     | R                | 0.99498             | 0.9964              | 0.99698             | 0.99643             |
|                                     | R <sup>2</sup>   | 0.02642             | 0.0190              | 0.01532             | 0.03459             |
| First-order<br>exponential kinetics | k                | 0.00987             | 0.011               | 0.01067             | 0.01153             |
|                                     | R                | <b>0.99894</b>      | <b>0.99847</b>      | <b>0.99797</b>      | <b>0.99857</b>      |
|                                     | R <sup>2</sup>   | 0.00174             | 0.00229             | 0.00286             | 0.00377             |
| Hixon-Crowell<br>model              | k <sub>1/3</sub> | 0.0031              | 0.00309             | 0.00304             | 0.00392             |
|                                     | R                | 0.95262             | 0.94361             | 0.94442             | 0.93402             |
|                                     | R <sup>2</sup>   | 0.42539             | 0.51115             | 0.4848              | 0.97728             |
| Square root of mass                 | k <sub>1/2</sub> | 0.00138             | 0.00136             | 0.00133             | 0.00198             |
|                                     | R                | 0.97196             | 0.96404             | 0.96475             | 0.96668             |
|                                     | R <sup>2</sup>   | 0.04811             | 0.06141             | 0.05714             | 0.11907             |
| Three seconds<br>root of mass       | k <sub>2/3</sub> | 0.00433             | 0.00434             | 0.00429             | 0.0049              |
|                                     | R                | 0.92295             | 0.91304             | 0.91395             | 0.89                |
|                                     | R <sup>2</sup>   | 1.41368             | 1.63052             | 1.57557             | 2.73399             |
| Weibull kinetics                    | β                | 0.93493             | 0.84675             | 0.81489             | 0.83671             |
|                                     | R                | 0.98567             | 0.97939             | 0.98375             | 0.99032             |
|                                     | R <sup>2</sup>   | 1.23549             | 1.47159             | 1.06773             | 0.664               |

of squares (R<sup>2</sup>) using kinetic equations for the release of dapsone from D<sub>x</sub>DAB NLCs



**Table S9.** Composition of investigated NLCs formulations including the amount of solid lipid, amount and type of liquid lipid, type of surfactant, type of alcohol and its inference

| <b>Formulations</b>        | <b>Amount of<br/>sophorolipid<br/>(w/w %)</b> | <b>Amount of<br/>liquid lipid<br/>(w/w %)</b> | <b>Type of<br/>liquid lipid</b> | <b>Type of<br/>Surfactant</b> | <b>Type of<br/>Alcohol</b> |
|----------------------------|-----------------------------------------------|-----------------------------------------------|---------------------------------|-------------------------------|----------------------------|
| <b>NLC-1<br/>(Control)</b> | <b>40</b>                                     | <b>60</b>                                     | <b>Oleic acid</b>               | <b>Tween 80</b>               | <b>Ethanol</b>             |
| NLC-2                      | 60                                            | 40                                            | Oleic acid                      | Tween 80                      | Ethanol                    |
| NLC-3                      | 40                                            | 60                                            | Linoleic acid                   | Tween 80                      | Ethanol                    |
| NLC-4                      | 40                                            | 60                                            | Oleic acid                      | Tween 40                      | Ethanol                    |
| NLC-5                      | 40                                            | 60                                            | Oleic acid                      | Tween 80                      | Butanol                    |

**Table S10.** Entrapment efficiency of Rifampicin (RIF) and Dapsone (DAP) loaded NLCs upon component variation

| <b>Formulation</b>          | <b>NLC-1</b> | <b>NLC-2</b> | <b>NLC-3</b> | <b>NLC-4</b> | <b>NLC-5</b> |
|-----------------------------|--------------|--------------|--------------|--------------|--------------|
| D <sub>12</sub> DAB NLCs    |              |              |              |              |              |
| <b>EE<sub>RIF</sub> (%)</b> | 98.2         | 98.8         | 96.1         | 97.3         | 93.5         |
| <b>EE<sub>DAP</sub> (%)</b> | 97.1         | 98.8         | 95.8         | 96.3         | 95.2         |
| <b>R<sub>s</sub> in nm</b>  | 106.0        | 108.3        | 99.7         | 102.1        | 96.3         |
| D <sub>14</sub> DAB NLCs    |              |              |              |              |              |
| <b>EE<sub>RIF</sub> (%)</b> | 98.3         | 99.3         | 96.7         | 97.8         | 94.3         |
| <b>EE<sub>DAP</sub> (%)</b> | 98.7         | 99.0         | 96.3         | 96.8         | 95.2         |
| <b>R<sub>s</sub> in nm</b>  | 110.4        | 114.1        | 102.1        | 104.1        | 97.2         |
| D <sub>16</sub> DAB NLCs    |              |              |              |              |              |
| <b>EE<sub>RIF</sub> (%)</b> | 98.6         | 99.7         | 97.4         | 98.4         | 95.2         |
| <b>EE<sub>DAP</sub> (%)</b> | 98.8         | 99.5         | 96.8         | 97.1         | 95.7         |
| <b>R<sub>s</sub> in nm</b>  | 113.9        | 116.0        | 105.7        | 108.8        | 103.8        |
| D <sub>18</sub> DAB NLCs    |              |              |              |              |              |
| <b>EE<sub>RIF</sub> (%)</b> | 98.2         | 98.6         | 95.4         | 96.5         | 93.0         |
| <b>EE<sub>DAP</sub> (%)</b> | 96.6         | 98.4         | 95.3         | 95.9         | 94.5         |
| <b>R<sub>s</sub> in nm</b>  | 99.6         | 106.7        | 95.8         | 97.8         | 90.7         |

**Table S11.** Stern-Volmer constant  $K_{sv}$ , binding constant  $K_b$ , aggregation number  $n$ , free energy change ( $\Delta G$ ), enthalpy change ( $\Delta H$ ) and entropy change ( $\Delta S$ ) with regression coefficients ( $R$ ) for BSA-Rifampicin and BSA-Dapsone at different temperatures

| <b>Rifampicin</b> |        |                                               |       |                                            |       |      |                             |                            |                            |
|-------------------|--------|-----------------------------------------------|-------|--------------------------------------------|-------|------|-----------------------------|----------------------------|----------------------------|
| $D_x DAB$<br>'x'  | T (K)  | $K_{sv} \times 10^4$<br>(mol <sup>-1</sup> L) | $R^2$ | $K_b \times 10^4$<br>(mol <sup>-1</sup> L) | $R^2$ | n    | $-\Delta G$<br>(kJ/<br>mol) | $\Delta H$<br>(kJ/<br>mol) | $\Delta S$<br>(J/K<br>mol) |
| <b>12</b>         | 298.15 | 0.097                                         | 0.99  | 6.82                                       | 0.98  | 1.40 | 27.58                       | 41.91                      | 233.20                     |
|                   | 303.15 | 0.093                                         | 0.99  | 10.10                                      | 0.99  | 0.90 | 29.51                       |                            | 235.72                     |
|                   | 308.15 | 0.073                                         | 0.99  | 14.37                                      | 0.99  | 0.85 | 29.92                       |                            | 233.23                     |
| <b>14</b>         | 298.15 | 0.104                                         | 0.98  | 12.85                                      | 0.99  | 0.99 | 29.15                       | 31.35                      | 203.04                     |
|                   | 303.15 | 0.103                                         | 0.99  | 15.65                                      | 0.99  | 0.80 | 30.13                       |                            | 202.94                     |
|                   | 308.15 | 0.102                                         | 0.99  | 19.38                                      | 0.99  | 0.67 | 31.18                       |                            | 203.04                     |
| <b>16</b>         | 298.15 | 0.112                                         | 0.98  | 11.50                                      | 0.99  | 1.03 | 28.88                       | 49.98                      | 264.62                     |
|                   | 303.15 | 0.098                                         | 0.99  | 13.25                                      | 0.98  | 0.86 | 29.72                       |                            | 263.03                     |
|                   | 308.15 | 0.091                                         | 0.99  | 22.10                                      | 0.99  | 0.64 | 31.52                       |                            | 264.60                     |
| <b>18</b>         | 298.15 | 0.090                                         | 0.98  | 9.55                                       | 0.98  | 0.78 | 28.57                       | 9.74                       | 128.57                     |
|                   | 303.15 | 0.067                                         | 0.98  | 11.58                                      | 0.99  | 0.74 | 29.01                       |                            | 127.90                     |
|                   | 308.15 | 0.060                                         | 0.99  | 13.99                                      | 0.99  | 0.79 | 29.85                       |                            | 128.56                     |
| <b>Dapsone</b>    |        |                                               |       |                                            |       |      |                             |                            |                            |
| <b>12</b>         | 298.15 | 0.027                                         | 0.99  | 5.81                                       | 0.98  | 1.20 | 27.64                       | 30.67                      | 195.69                     |
|                   | 303.15 | 0.025                                         | 0.99  | 9.19                                       | 0.98  | 0.77 | 28.32                       |                            | 194.70                     |
|                   | 308.15 | 0.021                                         | 0.99  | 10.43                                      | 0.99  | 0.86 | 29.59                       |                            | 195.68                     |
| <b>14</b>         | 298.15 | 0.029                                         | 0.99  | 10.80                                      | 0.99  | 1.26 | 26.82                       | 58.41                      | 286.01                     |
|                   | 303.15 | 0.027                                         | 0.99  | 13.24                                      | 0.99  | 0.86 | 28.71                       |                            | 287.53                     |
|                   | 308.15 | 0.022                                         | 0.98  | 15.96                                      | 0.99  | 0.78 | 29.69                       |                            | 286.03                     |
| <b>16</b>         | 298.15 | 0.036                                         | 0.99  | 16.14                                      | 0.99  | 0.80 | 30.31                       | 19.46                      | 167.04                     |
|                   | 303.15 | 0.033                                         | 0.99  | 23.67                                      | 0.99  | 0.54 | 31.30                       |                            | 167.55                     |
|                   | 308.15 | 0.031                                         | 0.98  | 25.88                                      | 0.99  | 0.59 | 31.98                       |                            | 167.04                     |
| <b>18</b>         | 298.15 | 0.027                                         | 0.99  | 10.30                                      | 0.99  | 0.92 | 28.78                       | 24.68                      | 179.40                     |
|                   | 303.15 | 0.023                                         | 0.99  | 11.20                                      | 0.99  | 0.88 | 29.42                       |                            | 178.54                     |
|                   | 308.15 | 0.021                                         | 0.99  | 14.36                                      | 0.99  | 0.78 | 30.57                       |                            | 179.39                     |
